# Supplementary material for: Liraglutide in Type 2 Diabetes Mellitus: Clinical Pharmacokinetics and Pharmacodynamics
Source: Springer Nature journal article supplement (doi:10.1007/s40262-015-0343-6), 2015-11-23
Supplement: 40262_2015_343_MOESM1_ESM.pdf [file 40262_2015_343_MOESM1_ESM.pdf]

## **Liraglutide in Type 2 Diabetes: Clinical Pharmacokinetics and Pharmacodynamics**

**Authors:** Jacobsen LV<sup>1</sup>, Flint A<sup>1</sup>, Olsen AK<sup>2</sup>, Ingwersen SH<sup>1</sup>

**Journal:** Clinical Pharmacokinetics

### **Corresponding author:**

SH Ingwersen. Novo Nordisk A/S, Copenhagen, Denmark. Email: [si@novonordisk.com](mailto:si@novonordisk.com), Phone: +4530794847, Fax: +4544436740

### **Affiliations:**

<sup>1</sup>Clinical Pharmacology, Global Development, Novo Nordisk A/S, Copenhagen, Denmark

<sup>2</sup>NCD Project Management, Non-clinical Development, Novo Nordisk A/S, Copenhagen, Denmark

### **Correspondence:**

SH Ingwersen, Novo Nordisk A/S, Vandtårnsvej 110, DK-2860 Søborg, Denmark

E-mail: [si@novonordisk.com](mailto:si@novonordisk.com)

# Supplementary table

**Table 1. Overview of studies on liraglutide for T2DM therapy focussing on pharmacokinetics and pharmacodynamics**

| First author, year (reference)                                | Primary focus                                                   | Study population                                                | Number of participants         | Liraglutide dose (treatment duration <sup>a</sup> )                                         |
|---------------------------------------------------------------|-----------------------------------------------------------------|-----------------------------------------------------------------|--------------------------------|---------------------------------------------------------------------------------------------|
| <b>Studies performed only in individuals without diabetes</b> |                                                                 |                                                                 |                                |                                                                                             |
| Malm-Erfjält 2010 (32)                                        | Metabolism, excretion and <i>in vitro</i> degradation           | Healthy males                                                   | 7                              | 0.75 mg <sup>3</sup> H-labelled (single dose)                                               |
| Agersø 2002 (36)                                              | Pharmacokinetics, pharmacodynamics, safety and tolerability     | Healthy males                                                   | Liraglutide: 15<br>Placebo: 10 | 1.25, 5.0, 7.5, 10 or 12.5 µg/kg [~0.1, 0.38, 0.56, 0.72 or 0.93 mg <sup>b</sup> ] (7 days) |
| Damholt 2006 (37)                                             | Pharmacokinetics by age and gender                              | Healthy                                                         | 32                             | 1.0 mg (single dose)                                                                        |
| Flint 2010 (38)                                               | Pharmacokinetics and safety in subjects with hepatic impairment | Healthy and subjects with varying degrees of hepatic impairment | 24                             | 0.75 mg (single dose)                                                                       |
| Irie 2008 (40)                                                | Tolerability, pharmacokinetics and pharmacodynamics             | Healthy Japanese males                                          | Liraglutide: 18<br>Placebo: 6  | 15, 20 and 25 µg/kg [~0.85, 1.25 and 1.63 mg <sup>b</sup> ] (1–3 weeks)                     |
| Jacobsen 2009 (41)                                            | Pharmacokinetics and safety in subjects with renal impairment   | Healthy and subjects with varying degrees of renal impairment   | 30                             | 0.75 mg (single dose)                                                                       |
| Jiang 2011 (42)                                               | Pharmacokinetics, pharmacodynamics and tolerability             | Healthy Chinese males                                           | Liraglutide: 28<br>Placebo: 9  | 0.6, 1.2 or 1.8 mg (3 weeks)                                                                |
| Kapitza 2011 (43)                                             | Pharmacokinetics by injection site                              | Healthy                                                         | 21                             | 0.6 mg (single dose)                                                                        |

|                                                                                                     |                                                                                            |                                     |                                      |                                                                                                                                           |
|-----------------------------------------------------------------------------------------------------|--------------------------------------------------------------------------------------------|-------------------------------------|--------------------------------------|-------------------------------------------------------------------------------------------------------------------------------------------|
| Malm-Erjefält 2015 (44)                                                                             | Drug–drug interaction - atorvastatin, griseofulvin, lisinopril, digoxin                    | Healthy                             | 70<br>Cross-over with placebo        | 1.8 mg<br>(up to 5 weeks)                                                                                                                 |
| Elbrønd 2002 (45)                                                                                   | Pharmacokinetics, pharmacodynamics, safety and tolerability                                | Healthy males                       | Liraglutide: 54<br>Placebo: 18       | 1.25, 2.5, 5.0, 10.0, 12.5, 15.0, 17.5 and 20.0 µg/kg [~0.09, 0.18, 0.39, 0.74, 0.91, 1.14, 1.33 and 1.44 mg <sup>b</sup> ] (single dose) |
| Jacobsen 2011 (53)                                                                                  | Drug–drug interaction - ethinyl oestradiol/levonorgestrel (combination oral contraceptive) | Healthy postmenopausal women        | 21<br>Cross-over with placebo        | 1.8 mg<br>(3 weeks)                                                                                                                       |
| Iepsen 2015 (82)                                                                                    | Bone formation and weight loss                                                             | Healthy obese women                 | Liraglutide: 18<br>Controls: 19      | 1.2 mg<br>(52 weeks)                                                                                                                      |
| Chatterjee 2009 (83)                                                                                | Cardiac repolarisation; QT <sub>c</sub> study                                              | Healthy                             | 51<br>Cross-over with placebo        | 1.2 or 1.8 mg<br>(3 weeks)                                                                                                                |
| <b>Studies performed in subjects with T2DM and studies including both healthy subjects and T2DM</b> |                                                                                            |                                     |                                      |                                                                                                                                           |
| Garber 2009 (10)                                                                                    | Safety and efficacy vs. glimepiride monotherapy                                            | T2DM                                | Liraglutide: 497<br>Glimepiride: 248 | 1.2 or 1.8 mg<br>(52 weeks)                                                                                                               |
| Yang 2011 (34)                                                                                      | Efficacy and safety vs. glimepiride, in combination with metformin                         | T2DM, Asians                        | Liraglutide: 697<br>Glimepiride: 231 | 0.6, 1.2 or 1.8 mg<br>(16 weeks)                                                                                                          |
| Hermansen 2013 (39)                                                                                 | Effect on postprandial lipid concentration                                                 | T2DM                                | 20<br>Cross-over with placebo        | 1.8 mg daily<br>(3 weeks)                                                                                                                 |
| Klein 2014 (48)                                                                                     | Pharmacokinetics, pharmacodynamics, safety and tolerability in paediatric subjects         | T2DM; aged 10–17 years              | Liraglutide: 14<br>Placebo: 7        | 0.3, 0.6, 0.9, 1.2 and 1.8 mg<br>(5 weeks)                                                                                                |
| Davies 2014 (49)                                                                                    | Efficacy and safety in subjects with T2DM and renal impairment                             | T2DM with moderate renal impairment | Liraglutide: 140<br>Placebo: 137     | 1.8 mg<br>(26 weeks)                                                                                                                      |
| Osonoi 2014 (50)                                                                                    | Effect of haemodialysis on plasma glucose profile, liraglutide concentrations and safety   | T2DM Japanese with ESRD             | 10                                   | 0.6 or 0.9 mg<br>(2 days)                                                                                                                 |

|                                |                                                                             |                         |                                                                                |                                                                                   |
|--------------------------------|-----------------------------------------------------------------------------|-------------------------|--------------------------------------------------------------------------------|-----------------------------------------------------------------------------------|
| Idorn 2015 (51)                | Safety and efficacy in dialysis-dependent ESRD subjects                     | T2DM and T2DM with ESRD | Liraglutide: 10 T2DM with ESRD; 10 T2DM<br>Placebo: 10 T2DM with ESRD; 10 T2DM | 1.8 mg<br>(12 weeks)                                                              |
| Kapitza 2011 (54) <sup>c</sup> | Drug–drug interaction - acetaminophen                                       | T2DM                    | 18<br>Cross-over with placebo                                                  | 1.8 mg<br>(3 weeks)                                                               |
| Morrow 2011 (56)               | Drug–drug interaction - insulin detemir                                     | T2DM                    | 33                                                                             | 1.8 mg<br>(4 weeks)                                                               |
| Juhl 2002 (58)                 | Effect on fasting and postprandial glycaemia                                | T2DM                    | 11<br>Cross-over with placebo                                                  | 10 µg/kg [~0.87 mg <sup>b</sup> ]<br>(single dose)                                |
| Chang 2003 (59)                | β-cell sensitivity                                                          | T2DM and healthy        | T2DM: 10<br>Cross-over with placebo<br>Healthy: 10                             | 7.5 µg/kg [~0.66 mg <sup>b</sup> ]<br>(single dose)                               |
| Nauck 2003 (60)                | Counter regulatory response to hypoglycaemia                                | T2DM                    | 11<br>Cross-over with placebo                                                  | 7.5 µg/kg [~0.68 mg <sup>b</sup> ]<br>(single dose)                               |
| Flint 2011 (61) <sup>c</sup>   | Postprandial glucose response                                               | T2DM                    | 18<br>Cross-over with placebo                                                  | 0.6, 1.2 or 1.8 mg<br>(3 weeks)                                                   |
| Horowitz 2012 (62)             | Effects on appetite, energy intake, energy expenditure and gastric emptying | T2DM                    | 46<br>Cross-over with placebo or glimepiride                                   | 1.8 mg<br>(4 weeks)                                                               |
| Vilsbøll 2008 (63)             | β-cell function and arginine-stimulated insulin secretion                   | T2DM and healthy        | Liraglutide: 29<br>Placebo: 10<br>Healthy: 12                                  | 0.65, 1.25 or 1.9 mg<br>(14 weeks)                                                |
| Jendle 2009 (64)               | Body composition, alone or in combination with metformin                    | T2DM                    | Trial1: 221<br>Trial 2: 154                                                    | Trial 1: 0.6, 1.2 or 1.8 mg<br>(26 weeks)<br>Trial 2: 1.2 or 1.8 mg<br>(52 weeks) |
| Flint 2013 (65) <sup>c</sup>   | Appetite and energy intake                                                  | T2DM                    | 18<br>Cross-over with placebo                                                  | 1.8 mg<br>(3 weeks)                                                               |
| Degn 2004 (66)                 | 24 hour glycaemia, and β-cell function                                      | T2DM                    | 13                                                                             | 6 µg/kg [~0.55 mg <sup>b</sup> ]<br>(8–9 days)                                    |

| Population pharmacokinetics and exposure–response analysis studies |                                                                                                               |                                                         |                                                                                                                                     |                                                                                            |
|--------------------------------------------------------------------|---------------------------------------------------------------------------------------------------------------|---------------------------------------------------------|-------------------------------------------------------------------------------------------------------------------------------------|--------------------------------------------------------------------------------------------|
| Ingwersen 2012 (33) <sup>d</sup>                                   | Exposure–response and population pharmacokinetic evaluations for dosing rationale                             | T2DM                                                    | Trial 1: 190<br>Trial 2: 163<br>Trial 3: 745                                                                                        | 0.045–1.9 mg (12–52 weeks)                                                                 |
| Ingwersen 2015 (35) <sup>e</sup>                                   | Population pharmacokinetics and exposure–response relationship                                                | T2DM, Asians                                            | 605                                                                                                                                 | 0.6, 1.2 or 1.8 mg (16 weeks)                                                              |
| Watson 2010 (46) <sup>f</sup>                                      | Population pharmacokinetics vs. exenatide                                                                     | Healthy and T2DM                                        | Liraglutide: 192 patients;<br>74 healthy<br>Exenatide: 28 patients                                                                  | Healthy: 1.25–20 µg/kg [ $\sim$ 0.09–1.44 mg <sup>b</sup> ];<br>T2DM: 0.65, 1.25 or 1.9 mg |
| Petri 2015 (47) <sup>g</sup>                                       | Comparison of pharmacokinetics between paediatric and adult populations                                       | Trial 1: T2DM; aged 10–17 years<br>Trials 2 and 3: T2DM | Trial 1 (liraglutide): 13<br>Trial 2 (liraglutide): 12<br>Cross-over with placebo<br>Trial 3 (liraglutide and insulin degludec): 32 | Trial 1: 0.3, 0.6, 0.9, 1.2 and 1.8 mg<br>Trials 2 and 3: 1.8 mg                           |
| Flint 2010 (76) <sup>h</sup>                                       | Relationship between liraglutide plasma concentrations and plasma glucose, gastric emptying and energy intake | T2DM                                                    | 18                                                                                                                                  | 0.6, 1.2 or 1.8 mg (3 weeks)                                                               |

Unless otherwise indicated, all studies were performed in adults, subjects of both genders and race was not pre-specified. ESRD, end-stage renal disease; T2DM, type 2 diabetes mellitus.

<sup>a</sup>For multiple dose trials, liraglutide doses are once daily and treatment duration includes weekly dose escalations. <sup>b</sup>Unit conversions from µg/kg to mg were approximated based on individual body weight of participants [Novo Nordisk, data on file].

<sup>c</sup>Kapitza 2011 (54), Flint 2011 (61) and Flint 2013 (65) were studies based on the same trial population; <sup>d</sup>Ingwersen 2012 (33) was based on data from Vilsbøll 2008 (63) and Garber 2009 (10); <sup>e</sup>Ingwersen 2015 (35) was based on data from Yang 2011 (34); <sup>f</sup>Watson 2010 was based on data from Agersø 2002 (36), Elbrønd 2002 (45), Juhl 2002 (58) and Nauck 2003 (60); <sup>g</sup>Petri 2015 (47) was based on data from Klein 2014 (48), Hermansen 2013 (39) and Morrow 2011 (56); <sup>h</sup>Flint 2010 (76) was based on the same data as Flint 2011 (61) and Flint 2013 (65).
